# Supplementary material for: Responsive ZIF-90 nanocomposite material: targeted delivery of 10-hydroxycamptothecine to enhance the therapeutic effect of colon cancer (HCT116) cells
Source: Royal Society of Chemistry journal article supplement (doi:10.1039/d3md00725a), 2024-01-01
Supplement: d3md00725a1.pdf [file d3md00725a1.pdf]

## Supporting Information

### Responsive ZIF-90 nanocomposite material: targeted delivery of 10-hydroxycamptothecin to enhance the therapeutic effect of colon cancer (HCT116) cells

Ji-Chao Guo<sup>a</sup>, Shi-Hui Deng<sup>a</sup>, Shu-Min Zhou<sup>a</sup>, Xuan Zhou<sup>a</sup>, Jiajia Du<sup>a</sup>, Si-Han Zhou<sup>a</sup>, Qi-Hua Zhao<sup>a</sup>, Zhong-Yan Cai<sup>a</sup>, Xiaoxia Ren<sup>b,\*</sup>, Ming-jin Xie<sup>a,\*</sup>

<sup>a</sup>*School of Chemical Science and Technology, Yunnan University, Kunming, 650091, Yunnan, China.*

<sup>b</sup>*Animal Research and Resource Center, School of Life Sciences, Yunnan University, Kunming, 650091, Yunnan, China.*

*Correspondence and requests for materials should be addressed to M.J.X. (email: [mjxie@ynu.edu.cn](mailto:mjxie@ynu.edu.cn))*

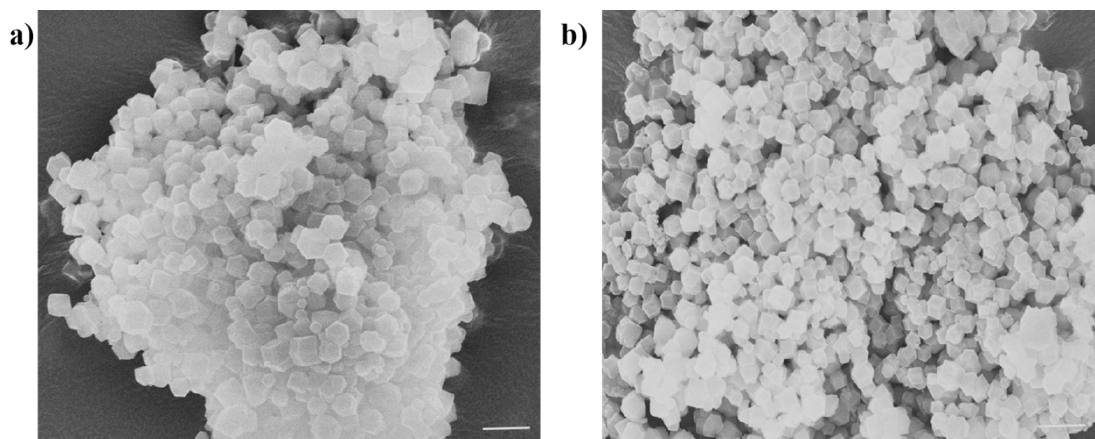

**Fig. S1** (a) SEM image of ZIF-90. (b) SEM image of HCPT@ZIF-90.

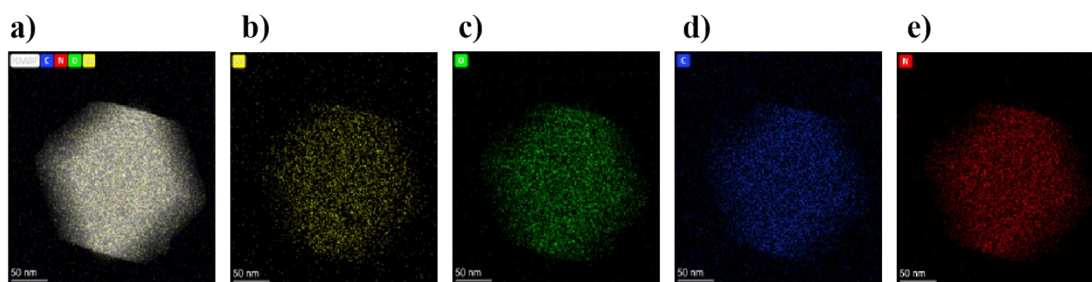

**Fig. S2** EDS elemental mapping of ZIF-90 (a), Zn (b), O (c), C (d), N(e).

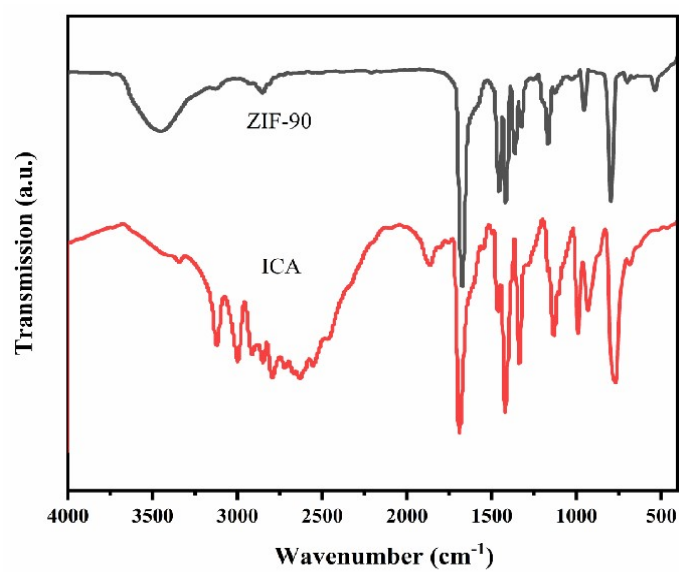

**Fig. S3** FT-IR spectra of ZIF-90 and ICA ligand.

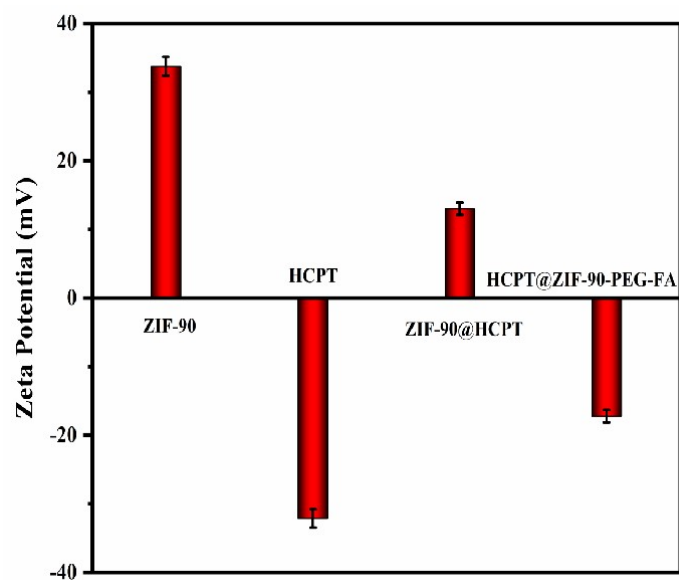

**Fig. S4** A sequence of changes in the sample zeta potentials obtained after each synthetic step.

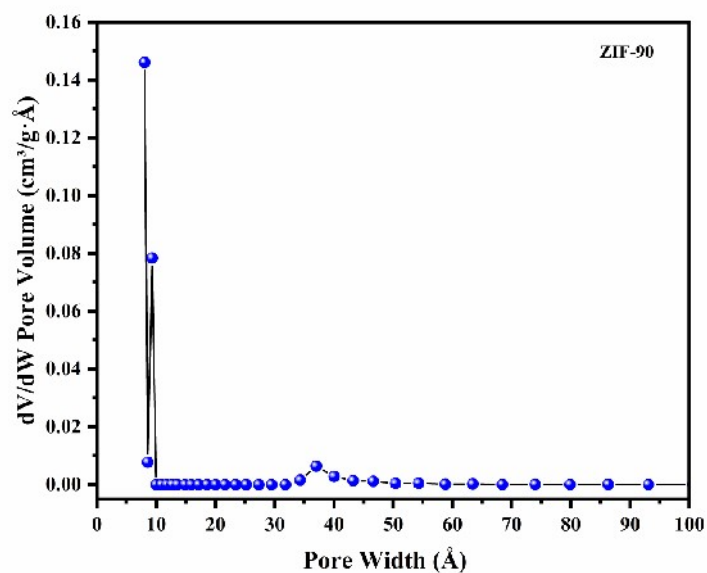

**Fig. S5** Pore size distribution of ZIF-90.

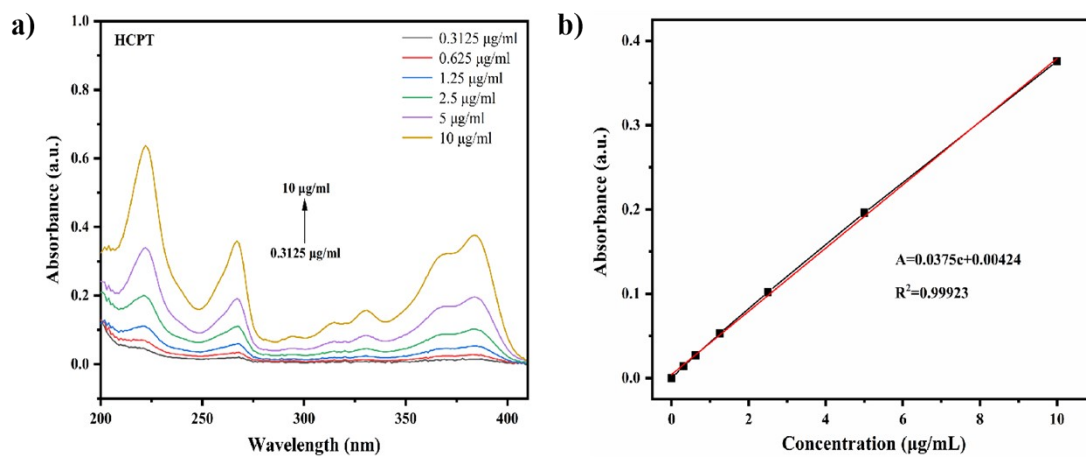

**Fig. S6** UV-vis spectra of (a) HCPT at different concentrations and (b) standard curve of HCPT.

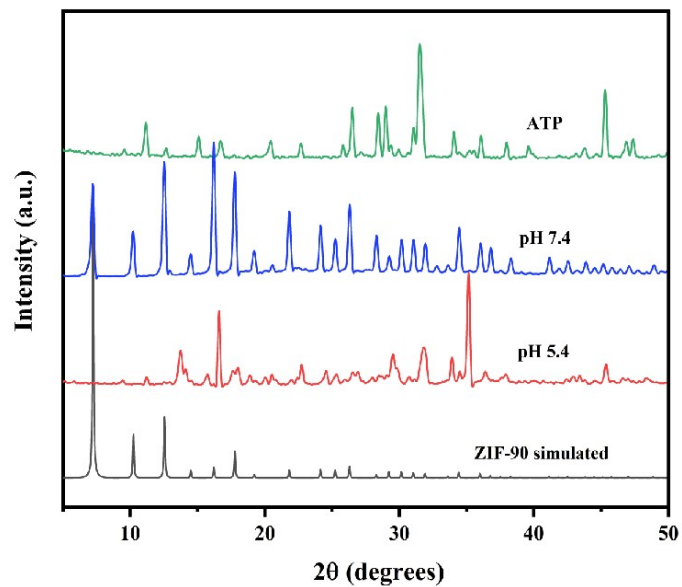

**Fig. S7** XRD patterns of ZIF-90 nanoparticles under different conditions.

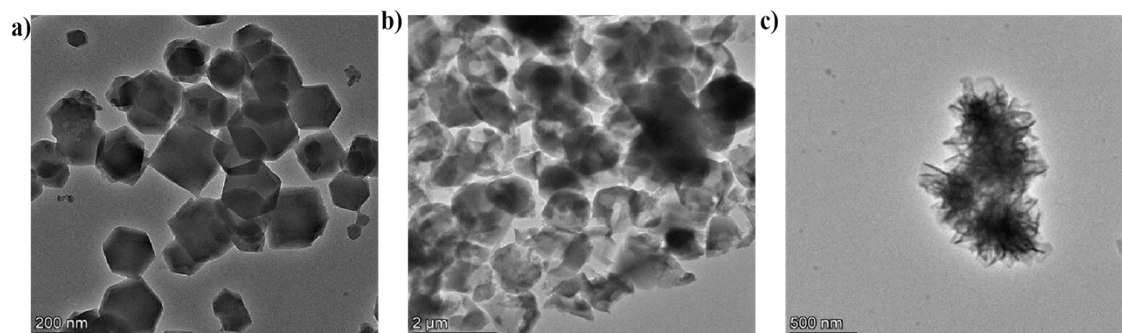

**Fig. S8** TEM images of ZIF-90 nanoparticles under (a) PH = 7, (b) PH = 5.4, and (c) 10mM ATP conditions.
